# Supplementary material for: Systematic Investigation of Scutellariae Barbatae Herba for Treating Hepatocellular Carcinoma Based on Network Pharmacology
Source: Evid Based Complement Alternat Med. 2018 Nov 21;2018:4365739. doi: 10.1155/2018/4365739 (PMC6280310; doi:10.1155/2018/4365739)
Supplement: Supplementary Materials — Table S1: 29 active ingredients from TCMSP. Table S2: ingredients in SBH and corresponding targets. Table S3: HCC targets. Table S4: candidate targets of SBH. Table S5: Gene Ontology (GO) Molecular Function Analysis for candidate targets of SBH. Table S6: Gene Ontology (GO) Biological Process Analysis for candidate targets of SBH. Table S7: Reactome analysis for candidate targets of SBH. Table S8: hit genes analysed by Expression Atlas. [file 4365739.f1.zip]

Archive with 9 entries (8 files):
- 4365739.f1/
- 4365739.f1/Table S1.xlsx
- 4365739.f1/Table S2.xlsx
- 4365739.f1/Table S3.xlsx
- 4365739.f1/Table S4.xlsx
- 4365739.f1/Table S5.xlsx
- 4365739.f1/Table S6.xlsx
- 4365739.f1/Table S7.xlsx
- 4365739.f1/Table S8.xlsx
