# Supplementary material for: Systematic Investigation of Scutellariae Barbatae Herba for Treating Hepatocellular Carcinoma Based on Network Pharmacology
Source: Evid Based Complement Alternat Med. 2018 Nov 21;2018:4365739. doi: 10.1155/2018/4365739 (PMC6280310; doi:10.1155/2018/4365739)
Supplement: Supplementary Materials — Table S1: 29 active ingredients from TCMSP. Table S2: ingredients in SBH and corresponding targets. Table S3: HCC targets. Table S4: candidate targets of SBH. Table S5: Gene Ontology (GO) Molecular Function Analysis for candidate targets of SBH. Table S6: Gene Ontology (GO) Biological Process Analysis for candidate targets of SBH. Table S7: Reactome analysis for candidate targets of SBH. Table S8: hit genes analysed by Expression Atlas. [file 4365739.f1.zip › 4365739.f1/Table S1.xlsx]

## Sheet: Sheet1
Table S1 Active Herbal Ingredients in SBH
Molecule Name	OB(%)	DL
(2R)-5,7-dihydroxy-2-(4-hydroxyphenyl)chroman-4-one	42.36	0.21
5,7,4'-trihydroxy-6-methoxyflavanone	36.63	0.27
5,7,4'-trihydroxy-8-methoxyflavanone	74.24	0.26
5-hydroxy-7,8-dimethoxy-2-(4-methoxyphenyl)chromone	65.82	0.33
7-hydroxy-5,8-dimethoxy-2-phenyl-chromone	43.72	0.25
Chrysin-5-methylether	37.27	0.2
9,19-cyclolanost-24-en-3-ol	38.69	0.78
Baicalin	40.12	0.75
campesterol	37.58	0.71
CLR	37.87	0.68
beta-sitosterol	36.91	0.75
rivularin	37.94	0.37
Sitosteryl acetate	40.39	0.85
Stigmasta-5,22-dien-3-ol-acetate	46.44	0.86
Stigmastan-3,5,22-triene	45.03	0.71
Stigmasterol	43.83	0.76
wogonin	30.68	0.23
Dinatin	30.97	0.27
24-Ethylcholest-4-en-3-one	36.08	0.76
baicalein	33.52	0.21
6-Hydroxynaringenin	33.23	0.24
Salvigenin	49.07	0.33
Rhamnazin	47.14	0.34
sitosterol	36.91	0.75
eriodictyol	71.79	0.24
daucostero_qt	36.91	0.75
luteolin	36.16	0.25
Moslosooflavone	44.09	0.25
quercetin	46.43	0.28
