# Supplementary material for: Systematic Investigation of Scutellariae Barbatae Herba for Treating Hepatocellular Carcinoma Based on Network Pharmacology
Source: Evid Based Complement Alternat Med. 2018 Nov 21;2018:4365739. doi: 10.1155/2018/4365739 (PMC6280310; doi:10.1155/2018/4365739)
Supplement: Supplementary Materials — Table S1: 29 active ingredients from TCMSP. Table S2: ingredients in SBH and corresponding targets. Table S3: HCC targets. Table S4: candidate targets of SBH. Table S5: Gene Ontology (GO) Molecular Function Analysis for candidate targets of SBH. Table S6: Gene Ontology (GO) Biological Process Analysis for candidate targets of SBH. Table S7: Reactome analysis for candidate targets of SBH. Table S8: hit genes analysed by Expression Atlas. [file 4365739.f1.zip › 4365739.f1/Table S2.xlsx]

## Sheet: Sheet1
Table S2 Ingredients in SBH and corresponding targets
Molecule Name	Pubchem CID	Protein name	Uniprot
(2R)-5,7-dihydroxy-2-(4-hydroxyphenyl)chroman-4-one	667495	Serum albumin	P02768
		Carbonic anhydrase 2	P00918
		Vitamin D-binding protein	P02774
5,7,4'-trihydroxy-6-methoxyflavanone	26213330	Ribonuclease UK114	P52758
		Transthyretin	P02766
		Peptidyl-prolyl cis-trans isomerase A	P62937
		Carbonic anhydrase 1	P00915
		Carbonic anhydrase 2	P00918
		Cyclin-A2	P20248
		S-methyl-5-thioadenosine phosphorylase	Q13126
		Glutathione S-transferase P	P09211
		Epidermal growth factor receptor	P00533
		Estrogen receptor	P03372
		Heat shock protein HSP 90-alpha	P07900
		Urokinase-type plasminogen activator	P00749
		Proto-oncogene tyrosine-protein kinase Src	P12931
		Serine/threonine-protein kinase 6	O14965
		Heat shock cognate 71 kDa protein	P11142
5-hydroxy-7,8-dimethoxy-2-(4-methoxyphenyl)chromone	14353376	Cholinesterase	P06276
		Oxysterols receptor LXR-beta	P55055
		Estrogen receptor beta	Q92731
		Peptidyl-prolyl cis-trans isomerase A	P62937
		Estrogen receptor	P03372
		Carbonic anhydrase 1	P00915
		Androgen receptor	P10275
		Proto-oncogene serine/threonine-protein kinase Pim-1	P11309
7-hydroxy-5,8-dimethoxy-2-phenyl-chromone	14825644	Androgen receptor	P10275
		Peptidyl-prolyl cis-trans isomerase A	P62937
		Heat shock protein HSP 90-alpha	P07900
		Tyrosine-protein kinase HCK	P08631
		Carbonic anhydrase 1	P00915
		Cholinesterase	P06276
		Cell division protein kinase 2	P24941
		Estrogen receptor	P03372
		Progesterone receptor	P06401
		Glutathione reductase, mitochondrial	P00390
		Estrogen receptor beta	Q92731
Chrysin-5-methylether	5490127	Carbonic anhydrase 1	P00915
		Cholinesterase	P06276
		Liver carboxylesterase 1	P23141
		Angiogenin	P03950
Baicalin	64982	Aldo-keto reductase family 1 member C2	P52895
		Serum albumin	P02768
		Mitogen-activated protein kinase 1	P28482
		Amine oxidase [flavin-containing] B	P27338
		Proto-oncogene serine/threonine-protein kinase Pim-1	P11309
		Bone morphogenetic protein 2	P12643
		Steryl-sulfatase	P08842
		MAP kinase-activated protein kinase 2	P49137
		Apolipoprotein A-II	P02652
		Caspase-7	P55210
		Thyroid hormone receptor beta	P10828
		Carbonic anhydrase 2	P00918
		Progesterone receptor	P06401
		Mineralocorticoid receptor	P08235
		Estradiol 17-beta-dehydrogenase 1	P14061
		Collagenase 3	P45452
		Kinesin-like protein KIF11	P52732
		Nuclear receptor ROR-alpha	P35398
		SEC14-like protein 2	O76054
CLR	5997	Androgen receptor	P10275
		Estrogen receptor	P03372
		Cytochrome P450 19A1	P11511
		Carbonic anhydrase 2	P00918
		Prothrombin	P00734
		Tyrosine-protein kinase HCK	P08631
		Carbonic anhydrase 1	P00915
		Cholinesterase	P06276
		Cell division protein kinase 2	P24941
		Progesterone receptor	P06401
		Beta-secretase 1	P56817
		Glutathione reductase, mitochondrial	P00390
		Phosphatidylinositol-4,5-bisphosphate 3-kinase catalytic subunit gamma isoform	P48736
		Proto-oncogene serine/threonine-protein kinase Pim-1	P11309
		Seprase	Q12884
beta-sitosterol	222284	Carbonic anhydrase 2	P00918
		Estrogen receptor	P03372
		Carbonic anhydrase 1	P00915
		Androgen receptor	P10275
		Tyrosine-protein kinase HCK	P08631
		Cholinesterase	P06276
		Cell division protein kinase 2	P24941
		Prothrombin	P00734
		Proto-oncogene serine/threonine-protein kinase Pim-1	P11309
		Progesterone receptor	P06401
		Cytochrome P450 19A1	P11511
rivularin	13889022	Carbonic anhydrase 2	P00918
		Peptidyl-prolyl cis-trans isomerase A	P62937
		Epidermal growth factor receptor	P00533
		Prothrombin	P00734
		Proto-oncogene serine/threonine-protein kinase Pim-1	P11309
		Tyrosine-protein kinase HCK	P08631
		Estrogen receptor	P03372
		Complement factor B	P00751
		Cholinesterase	P06276
		Progesterone receptor	P06401
		Mitogen-activated protein kinase 10	P53779
		Mitogen-activated protein kinase 8	P45983
Sitosteryl acetate	5354503	Androgen receptor	P10275
		Carbonic anhydrase 1	P00915
		Estrogen receptor	P03372
		Glutathione S-transferase P	P09211
		Cytochrome P450 19A1	P11511
		Carbonic anhydrase 2	P00918
		Prothrombin	P00734
		Tyrosine-protein kinase HCK	P08631
		Cell division protein kinase 2	P24941
		Cholinesterase	P06276
		Progesterone receptor	P06401
		Beta-secretase 1	P56817
		Purine nucleoside phosphorylase	P00491
		Cyclin-A2	P20248
		Proto-oncogene serine/threonine-protein kinase Pim-1	P11309
		Glutathione reductase, mitochondrial	P00390
		Phosphatidylinositol-4,5-bisphosphate 3-kinase catalytic subunit gamma isoform	P48736
Stigmasterol	5280794	Aldo-keto reductase family 1 member C2	P52895
		Serum albumin	P02768
		Mitogen-activated protein kinase 1	P28482
		MAP kinase-activated protein kinase 2	P49137
		Bone morphogenetic protein 2	P12643
		Steryl-sulfatase	P08842
		Nuclear receptor ROR-alpha	P35398
		Amine oxidase [flavin-containing] B	P27338
		Apolipoprotein A-II	P02652
		Caspase-7	P55210
		Carbonic anhydrase 2	P00918
		Kinesin-like protein KIF11	P52732
		Proto-oncogene serine/threonine-protein kinase Pim-1	P11309
		Progesterone receptor	P06401
		Mineralocorticoid receptor	P08235
		Estradiol 17-beta-dehydrogenase 1	P14061
		Thyroid hormone receptor beta	P10828
wogonin	5281703	Carbonic anhydrase 1	P00915
		Peptidyl-prolyl cis-trans isomerase A	P62937
		Estrogen receptor	P03372
		Heat shock protein HSP 90-alpha	P07900
		Tyrosine-protein kinase HCK	P08631
		Cholinesterase	P06276
		Cell division protein kinase 2	P24941
		Carbonic anhydrase 2	P00918
		Proto-oncogene serine/threonine-protein kinase Pim-1	P11309
Dinatin	5281628	Peptidyl-prolyl cis-trans isomerase A	P62937
		Androgen receptor	P10275
		Carbonic anhydrase 1	P00915
		Estrogen receptor	P03372
		Oxysterols receptor LXR-beta	P55055
		Tyrosine-protein kinase HCK	P08631
		Cholinesterase	P06276
		Cell division protein kinase 2	P24941
		Estrogen receptor beta	Q92731
		Progesterone receptor	P06401
		Cytochrome P450 19A1	P11511
		Glutathione reductase, mitochondrial	P00390
24-Ethylcholest-4-en-3-one	5484202	Carbonic anhydrase 1	P00915
		Liver carboxylesterase 1	P23141
		Tyrosine-protein kinase HCK	P08631
		Carbonic anhydrase 2	P00918
		Cholinesterase	P06276
		Cell division protein kinase 2	P24941
		Angiogenin	P03950
baicalein	5281605	Estrogen receptor	P03372
		Peptidyl-prolyl cis-trans isomerase A	P62937
		Epidermal growth factor receptor	P00533
		Prothrombin	P00734
		Triggering receptor expressed on myeloid cells 1	Q9NP99
		Cholinesterase	P06276
		Complement factor B	P00751
		Progesterone receptor	P06401
		Glucosylceramidase	P04062
		Carbonic anhydrase 2	P00918
		Mitogen-activated protein kinase 10	P53779
		Cell division protein kinase 6	Q00534
6-Hydroxynaringenin	188308	Aldo-keto reductase family 1 member C2	P52895
		Mitogen-activated protein kinase 1	P28482
		Vitamin D-binding protein	P02774
		Estrogen receptor	P03372
		MAP kinase-activated protein kinase 2	P49137
		Apolipoprotein A-II	P02652
		Bone morphogenetic protein 2	P12643
		Aldose reductase	P15121
		Nuclear receptor ROR-alpha	P35398
		Serum albumin	P02768
		Amine oxidase [flavin-containing] B	P27338
		Carbonic anhydrase 2	P00918
		Steryl-sulfatase	P08842
		Caspase-7	P55210
		Proto-oncogene serine/threonine-protein kinase Pim-1	P11309
		Kinesin-like protein KIF11	P52732
		Estradiol 17-beta-dehydrogenase 1	P14061
		Integrin alpha-L	P20701
Salvigenin	161271	Carbonic anhydrase 2	P00918
		Vitamin D-binding protein	P02774
		Serum albumin	P02768
		Mitogen-activated protein kinase 1	P28482
		Aldo-keto reductase family 1 member C2	P52895
		Bone morphogenetic protein 2	P12643
		Proto-oncogene serine/threonine-protein kinase Pim-1	P11309
		Thyroid hormone receptor beta	P10828
		Amine oxidase [flavin-containing] B	P27338
		Apolipoprotein A-II	P02652
		Progesterone receptor	P06401
		Estradiol 17-beta-dehydrogenase 1	P14061
		Caspase-7	P55210
		MAP kinase-activated protein kinase 2	P49137
		Steryl-sulfatase	P08842
		Kinesin-like protein KIF11	P52732
Rhamnazin	5320945	Estrogen receptor	P03372
		Cholinesterase	P06276
		Cell division protein kinase 2	P24941
sitosterol	12303645	Aldo-keto reductase family 1 member C2	P52895
		Serum albumin	P02768
		Androgen receptor	P10275
		Carbonic anhydrase 2	P00918
		Mitogen-activated protein kinase 1	P28482
		Bone morphogenetic protein 2	P12643
		Amine oxidase [flavin-containing] B	P27338
		Apolipoprotein A-II	P02652
		Steryl-sulfatase	P08842
		MAP kinase-activated protein kinase 2	P49137
		Thyroid hormone receptor beta	P10828
		Proto-oncogene serine/threonine-protein kinase Pim-1	P11309
		Caspase-7	P55210
		Collagenase 3	P45452
		Kinesin-like protein KIF11	P52732
		Nuclear receptor ROR-alpha	P35398
		Progesterone receptor	P06401
eriodictyol	440735	Liver carboxylesterase 1	P23141
		Carbonic anhydrase 2	P00918
		Mitogen-activated protein kinase 14	Q16539
		Carbonic anhydrase 1	P00915
		Cholinesterase	P06276
		Glucosylceramidase	P04062
		Cell division protein kinase 2	P24941
		Angiogenin	P03950
luteolin	5280445	Carbonic anhydrase 1	P00915
		Liver carboxylesterase 1	P23141
		Estrogen receptor	P03372
		Proto-oncogene serine/threonine-protein kinase Pim-1	P11309
		Cholinesterase	P06276
		Androgen receptor	P10275
		Cell division protein kinase 6	Q00534
		Cytochrome P450 19A1	P11511
		Angiogenin	P03950
Moslosooflavone	188316	Liver carboxylesterase 1	P23141
		Cell division protein kinase 2	P24941
		Cholinesterase	P06276
		Angiogenin	P03950
quercetin	5280343	Peptidyl-prolyl cis-trans isomerase A	P62937
		Cytochrome P450 19A1	P11511
		Cholinesterase	P06276
		Tyrosine-protein kinase HCK	P08631
		Carbonic anhydrase 1	P00915
		Estrogen receptor	P03372
		Androgen receptor	P10275
		Cell division protein kinase 2	P24941
		Estrogen receptor beta	Q92731
		Progesterone receptor	P06401
		Glutathione reductase, mitochondrial	P00390
