# Supplementary material for: Systematic Investigation of Scutellariae Barbatae Herba for Treating Hepatocellular Carcinoma Based on Network Pharmacology
Source: Evid Based Complement Alternat Med. 2018 Nov 21;2018:4365739. doi: 10.1155/2018/4365739 (PMC6280310; doi:10.1155/2018/4365739)
Supplement: Supplementary Materials — Table S1: 29 active ingredients from TCMSP. Table S2: ingredients in SBH and corresponding targets. Table S3: HCC targets. Table S4: candidate targets of SBH. Table S5: Gene Ontology (GO) Molecular Function Analysis for candidate targets of SBH. Table S6: Gene Ontology (GO) Biological Process Analysis for candidate targets of SBH. Table S7: Reactome analysis for candidate targets of SBH. Table S8: hit genes analysed by Expression Atlas. [file 4365739.f1.zip › 4365739.f1/Table S3.xlsx]

## Sheet: Sheet1
Table S3 HCC targets
Protein Name	Gene Symbol	Uniprot
glypican 3	GPC3	P51654
albumin	ALB	P02768
plasminogen	PLG	P00747
cytochrome P450, family 2, subfamily E, polypeptide 1	CYP2E1	P05181
secreted protein, acidic, cysteine-rich (osteonectin)	SPARC	P09486
aldolase B, fructose-bisphosphate	ALDOB	P05062
carbamoyl-phosphate synthase 1, mitochondrial	CPS1	P31327
heat shock 70kDa protein 5 (glucose-regulated protein, 78kDa)	HSPA5	P11021
insulin-like growth factor binding protein 3	IGFBP3	P17936
alanine-glyoxylate aminotransferase	AGXT	P21549
aldo-keto reductase family 1, member B10 (aldose reductase)	AKR1B10	O60218
apolipoprotein A-I	APOA1	P02647
arginase, liver	ARG1	P05089
chaperonin containing TCP1, subunit 3 (gamma)	CCT3	P49368
heat shock 27kDa protein 1	HSPB1	P04792
insulin-like growth factor 2 (somatomedin A)	IGF2	P01344
sulfotransferase family, cytosolic, 2A, dehydroepiandrosterone (DHEA)-preferring, member 1	SULT2A1	Q06520
glutamate-ammonia ligase	GLUL	P15104
hyaluronan-mediated motility receptor (RHAMM)	HMMR	O75330
heat shock protein 90kDa beta (Grp94), member 1	HSP90B1	P14625
stathmin 1	STMN1	P16949
alpha-2-macroglobulin	A2M	P01023
argininosuccinate synthase 1	ASS1	P00966
carbonic anhydrase II	CA2	P00918
CAP, adenylate cyclase-associated protein, 2 (yeast)	CAP2	P40123
cyclin-dependent kinase inhibitor 1A (p21, Cip1)	CDKN1A	P38936
connective tissue growth factor	CTGF	P29279
ephrin-A1	EFNA1	P20827
v-ets erythroblastosis virus E26 oncogene homolog 2 (avian)	ETS2	P15036
fatty acid binding protein 5 (psoriasis-associated)	FABP5	Q01469
glycine N-methyltransferase	GNMT	Q14749
hepatoma-derived growth factor	HDGF	P51858
heat shock 70kDa protein 1B	HSPA1B	P0DMV9
heat shock 70kDa protein 8	HSPA8	P11142
methionine adenosyltransferase I, alpha	MAT1A	Q00266
matrix metallopeptidase 9 (gelatinase B, 92kDa gelatinase, 92kDa type IV collagenase)	MMP9	P14780
non-metastatic cells 1, protein (NM23A) expressed in	NME1	P15531
proliferating cell nuclear antigen	PCNA	P12004
vitronectin	VTN	P04004
chemokine (C-X-C motif) ligand 12	CXCL12	P48061
high mobility group AT-hook 1	HMGA1	P17096
insulin-like growth factor 2 receptor	IGF2R	P11717
MAD2 mitotic arrest deficient-like 1 (yeast)	MAD2L1	Q13257
midkine (neurite growth-promoting factor 2)	MDK	P21741
paternally expressed 10	PEG10	Q86TG7
retinol binding protein 4, plasma	RBP4	P02753
ribosomal protein, large, P0	RPLP0	P05388
serpin peptidase inhibitor, clade F (alpha-2 antiplasmin, pigment epithelium derived factor), member 2	SERPINF2	P08697
SPARC-like 1 (hevin)	SPARCL1	Q14515
thrombospondin 1	THBS1	P07996
enoyl CoA hydratase, short chain, 1, mitochondrial	ECHS1	P30084
alcohol dehydrogenase 1B (class I), beta polypeptide	ADH1B	P00325
betaine--homocysteine S-methyltransferase	BHMT	Q93088
vimentin	VIM	P08670
regucalcin (senescence marker protein-30)	RGN	Q15493
transferrin	TF	P02787
fatty acid binding protein 1, liver	FABP1	P07148
4-hydroxyphenylpyruvate dioxygenase	HPD	P32754
acyl-CoA dehydrogenase, short/branched chain	ACADSB	P45954
catalase	CAT	P04040
methylenetetrahydrofolate dehydrogenase (NADP+ dependent) 1, methenyltetrahydrofolate cyclohydrolase, formyltetrahydrofolate synthetase	MTHFD1	P11586
ribosomal protein SA	RPSA	P08865
solute carrier family 22 (organic cation transporter), member 1	SLC22A1	O15245
tryptophan 2,3-dioxygenase	TDO2	P48775
alcohol dehydrogenase 4 (class II), pi polypeptide	ADH4	P08319
ceruloplasmin (ferroxidase)	CP	P00450
phosphoenolpyruvate carboxykinase 1 (soluble)	PCK1	P35558
acyl-CoA synthetase long-chain family member 1	ACSL1	P33121
aldehyde dehydrogenase 1 family, member L1	ALDH1L1	O75891
aldehyde dehydrogenase 4 family, member A1	ALDH4A1	P30038
cytochrome b5 type A (microsomal)	CYB5A	P00167
cytochrome P450, family 2, subfamily C, polypeptide 9	CYP2C9	P11712
fibrinogen beta chain	FGB	P02675
fibrinogen gamma chain	FGG	P02679
glyceraldehyde-3-phosphate dehydrogenase	GAPDH	P04406
heat-responsive protein 12	HRSP12	P52758
hydroxysteroid (17-beta) dehydrogenase 10	HSD17B10	Q99714
phosphoenolpyruvate carboxykinase 2 (mitochondrial)	PCK2	Q16822
protein disulfide isomerase family A, member 3	PDIA3	P30101
serpin peptidase inhibitor, clade A (alpha-1 antiproteinase, antitrypsin), member 1	SERPINA1	P01009
transthyretin	TTR	P02766
aldehyde oxidase 1	AOX1	Q06278
cathepsin B	CTSB	P07858
cytochrome P450, family 2, subfamily C, polypeptide 8	CYP2C8	P10632
fumarylacetoacetate hydrolase (fumarylacetoacetase)	FAH	P16930
fibrinogen alpha chain	FGA	P02671
fibrinogen-like 1	FGL1	Q08830
formiminotransferase cyclodeaminase	FTCD	O95954
growth hormone receptor	GHR	P10912
keratin 8	KRT8	P05787
N-myc downstream regulated 1	NDRG1	Q92597
S100 calcium binding protein A10	S100A10	P60903
sterol carrier protein 2	SCP2	P22307
selenium binding protein 1	SELENBP1	Q13228
ubiquitin D	UBD	O15205
acetyl-CoA acyltransferase 1	ACAA1	P09110
acetyl-CoA acyltransferase 2	ACAA2	P42765
alpha-fetoprotein	AFP	P02771
aldehyde dehydrogenase 2 family (mitochondrial)	ALDH2	P05091
annexin A2	ANXA2	P07355
budding uninhibited by benzimidazoles 1 homolog (yeast)	BUB1	O43683
chloride intracellular channel 1	CLIC1	O00299
collagen, type I, alpha 2	COL1A2	P08123
catechol-O-methyltransferase	COMT	P21964
cytochrome P450, family 2, subfamily B, polypeptide 6	CYP2B6	P20813
dicarbonyl/L-xylulose reductase	DCXR	Q7Z4W1
deoxyribonuclease I-like 3	DNASE1L3	Q13609
flap structure-specific endonuclease 1	FEN1	P39748
fibronectin 1	FN1	P02751
heterogeneous nuclear ribonucleoprotein A2/B1	HNRNPA2B1	P22626
inter-alpha (globulin) inhibitor H4 (plasma Kallikrein-sensitive glycoprotein)	ITIH4	Q14624
ketohexokinase (fructokinase)	KHK	P50053
metallothionein 2A	MT2A	P02795
nicotinamide N-methyltransferase	NNMT	P40261
nucleophosmin (nucleolar phosphoprotein B23, numatrin)	NPM1	P06748
proprotein convertase subtilisin/kexin type 6	PCSK6	P29122
phosphoglycerate kinase 1	PGK1	P00558
peptidylprolyl isomerase B (cyclophilin B)	PPIB	P23284
peroxiredoxin 6	PRDX6	P30041
replication factor C (activator 1) 4, 37kDa	RFC4	P35249
solute carrier family 2 (facilitated glucose transporter), member 2	SLC2A2	P11168
small nuclear ribonucleoprotein polypeptide E	SNRPE	P62304
topoisomerase (DNA) II alpha 170kDa	TOP2A	P11388
acetyl-CoA acetyltransferase 1	ACAT1	P24752
aminoacylase 1	ACY1	Q03154
aldehyde dehydrogenase 1 family, member A1	ALDH1A1	P00352
apolipoprotein C-III	APOC3	P02656
AT rich interactive domain 3A (BRIGHT-like)	ARID3A	Q99856
complement component 6	C6	P13671
complement component 9	C9	P02748
chaperonin containing TCP1, subunit 5 (epsilon)	CCT5	P48643
CD14 molecule	CD14	P08571
CD24 molecule	CD24	P25063
cyclin-dependent kinase 4	CDK4	P11802
carboxylesterase 1 (monocyte/macrophage serine esterase 1)	CES1	P23141
carboxylesterase 2 (intestine, liver)	CES2	O00748
clusterin	CLU	P10909
collagen, type I, alpha 1	COL1A1	P02452
carboxypeptidase B2 (plasma)	CPB2	Q96IY4
cytochrome P450, family 27, subfamily A, polypeptide 1	CYP27A1	Q02318
cytochrome P450, family 2, subfamily J, polypeptide 2	CYP2J2	P51589
cytochrome P450, family 3, subfamily A, polypeptide 4	CYP3A4	P08684
epoxide hydrolase 1, microsomal (xenobiotic)	EPHX1	P07099
fumarate hydratase	FH	P07954
group-specific component (vitamin D binding protein)	GC	P02774
3-hydroxyanthranilate 3,4-dioxygenase	HAAO	P46952
homogentisate 1,2-dioxygenase	HGD	Q93099
3-hydroxy-3-methylglutaryl-CoA synthase 2 (mitochondrial)	HMGCS2	P54868
hydroxysteroid (17-beta) dehydrogenase 4	HSD17B4	P51659
immunoglobulin kappa constant	IGKC	P01601
ISG15 ubiquitin-like modifier	ISG15	P05161
kininogen 1	KNG1	P01042
lysosomal-associated membrane protein 2	LAMP2	P13473
minichromosome maintenance complex component 2	MCM2	P49736
phosphatidylethanolamine N-methyltransferase	PEMT	Q9UBM1
progesterone receptor membrane component 1	PGRMC1	O00264
pyruvate kinase, muscle	PKM2	P14618
paraoxonase 3	PON3	Q15166
quinoid dihydropteridine reductase	QDPR	P09417
retinol binding protein 1, cellular	RBP1	P09455
RD RNA binding protein	RDBP	P18615
secretory carrier membrane protein 3	SCAMP3	O14828
serpin peptidase inhibitor, clade G (C1 inhibitor), member 1	SERPING1	P05155
superoxide dismutase 1, soluble	SOD1	P00441
thiosulfate sulfurtransferase (rhodanese)	TST	Q16762
tubulin, beta	TUBB	P07437
acyl-CoA dehydrogenase, very long chain	ACADVL	P49748
actin, beta	ACTB	P60709
alcohol dehydrogenase 1C (class I), gamma polypeptide	ADH1C	P00326
alcohol dehydrogenase 6 (class V)	ADH6	P28332
aldo-keto reductase family 1, member C2 (dihydrodiol dehydrogenase 2; bile acid binding protein; 3-alpha hydroxysteroid dehydrogenase, type III)	AKR1C2	P52895
aminolevulinate, delta-, synthase 1	ALAS1	P13196
aldehyde dehydrogenase 1 family, member B1	ALDH1B1	P30837
aldehyde dehydrogenase 3 family, member A2	ALDH3A2	P51648
aldolase A, fructose-bisphosphate	ALDOA	P04075
beta-2-microglobulin	B2M	P61769
BCL2/adenovirus E1B 19kDa interacting protein 3	BNIP3	Q12983
complement component 1, r subcomponent	C1R	P00736
chromosome 5 open reading frame 13	C5orf13	Q16612
complement component 8, alpha polypeptide	C8A	P07357
capping protein (actin filament), gelsolin-like	CAPG	P40121
chromobox homolog 1 (HP1 beta homolog Drosophila )	CBX1	P83916
complement factor H	CFH	P08603
corticotropin releasing hormone binding protein	CRHBP	P24387
cystatin B (stefin B)	CSTB	P04080
cystathionase (cystathionine gamma-lyase)	CTH	P32929
cytochrome P450, family 1, subfamily A, polypeptide 2	CYP1A2	P05177
cytochrome P450, family 2, subfamily A, polypeptide 6	CYP2A6	P11509
cytochrome P450, family 2, subfamily A, polypeptide 7	CYP2A7	P20853
cysteine-rich, angiogenic inducer, 61	CYR61	O00622
discoidin domain receptor tyrosine kinase 1	DDR1	Q08345
discs, large (Drosophila) homolog-associated protein 5	DLGAP5	Q15398
enolase 1, (alpha)	ENO1	P06733
Fc fragment of IgG, receptor, transporter, alpha	FCGRT	P55899
ficolin (collagen/fibrinogen domain containing) 3 (Hakata antigen)	FCN3	O75636
glutamate dehydrogenase 1	GLUD1	P00367
glyoxylate reductase/hydroxypyruvate reductase	GRHPR	Q9UBQ7
glycogen synthase 2 (liver)	GYS2	P54840
hepcidin antimicrobial peptide	HAMP	P81172
hydroxyacid oxidase (glycolate oxidase) 1	HAO1	Q9UJM8
HGF activator	HGFAC	Q04756
heterogeneous nuclear ribonucleoprotein C (C1/C2)	HNRNPC	P07910
hemopexin	HPX	P02790
hydroxysteroid (17-beta) dehydrogenase 6 homolog (mouse)	HSD17B6	O14756
interferon, alpha-inducible protein 27	IFI27	P40305
interferon-induced protein with tetratricopeptide repeats 1	IFIT1	P09914
interleukin enhancer binding factor 2, 45kDa	ILF2	Q12905
inter-alpha (globulin) inhibitor H2	ITIH2	P19823
inositol 1,4,5-triphosphate receptor, type 2	ITPR2	Q14571
kinesin family member 23	KIF23	Q02241
lysophosphatidylglycerol acyltransferase 1	LPGAT1	Q92604
lysozyme	LYZ	P61626
minichromosome maintenance complex component 6	MCM6	Q14566
metallothionein 1F	MT1F	H3BRY8
nicotinamide phosphoribosyltransferase	NAMPT	P43490
nuclear factor of kappa light polypeptide gene enhancer in B-cells inhibitor, alpha	NFKBIA	P25963
pyruvate carboxylase	PC	P11498
phosphoglucomutase 1	PGM1	P36871
peroxiredoxin 1	PRDX1	Q06830
protein Z, vitamin K-dependent plasma glycoprotein	PROZ	P22891
pituitary tumor-transforming 1	PTTG1	O95997
poly-U binding splicing factor 60KDa	PUF60	Q9UHX1
phosphorylase, glycogen; brain	PYGB	P11216
regulator of calcineurin 1	RCAN1	P53805
ras homolog gene family, member A	RHOA	P61586
ras homolog gene family, member B	RHOB	P62745
Rho family GTPase 3	RND3	P61587
ribosomal protein S5	RPS5	P46782
S100 calcium binding protein A6	S100A6	P06703
serum amyloid A2	SAA2	P0DJI9
serpin peptidase inhibitor, clade C (antithrombin), member 1	SERPINC1	P01008
serum/glucocorticoid regulated kinase 1	SGK1	O00141
solute carrier family 16, member 2 (monocarboxylic acid transporter 8)	SLC16A2	P36021
solute carrier family 7 (cationic amino acid transporter, y+ system), member 2	SLC7A2	P52569
superoxide dismutase 2, mitochondrial	SOD2	P04179
serglycin	SRGN	P10124
signal transducer and activator of transcription 1, 91kDa	STAT1	P42224
transglutaminase 2 (C polypeptide, protein-glutamine-gamma-glutamyltransferase)	TGM2	P21980
TIMP metallopeptidase inhibitor 1	TIMP1	P01033
transmembrane emp24 domain trafficking protein 2	TMED2	Q15363
tropomyosin 2 (beta)	TPM2	P07951
UDP glucuronosyltransferase 2 family, polypeptide B7	UGT2B7	P16662
Tumor protein p73	TP73	O15350
Runt-related transcription factor 3	RUNX3	Q13761
14-3-3 protein sigma	SFN	P31947
KH domain-containing, RNA-binding, signal transduction-associated protein 1	KHDRBS1	Q07666
ukaryotic translation initiation factor 3 subunit 2	EIF3S2	Q13347
Nuclease sensitive element-binding protein 1	YBX1	P67809
Cyclin-dependent kinase 6 inhibitor	CDKN2C	P42773
Leptin receptor precursor	LEPR	P48357
Interleukin-12 receptor beta-2 chain precursor	IL12RB2	Q99665
B-cell lymphoma/leukemia 10	BCL10	O95999
Guanine nucleotide-binding protein G(k) subunit alpha	GNAI3	P08754
Rho-related GTP-binding protein RhoC precursor	RHOC	P08134
Synaptonemal complex protein 1	SYCP1	Q15431
Induced myeloid leukemia cell differentiation protein Mcl-1	MCL1	Q07820
26S proteasome non-ATPase regulatory subunit 4	PSMD4	P55036
Protein S100-A9	S100A9	P06702
Protein JTB precursor	JTB	O76095
SHC-transforming protein 1	SHC1	P29353
Mucin-1 precursor	MUC1	P15941
YY1-associated protein 1	YY1AP1	Q9H869
Coatomer subunit alpha	COPA	P53621
Nicastrin precursor	NCSTN	Q92542
Cyclic AMP-dependent transcription factor ATF-6 alpha	ATF6	P18850
Prostaglandin G/H synthase 2 precursor	PTGS2	P35354
Regulator of G-protein signaling 1	RGS1	Q08116
Metastasis-suppressor KiSS-1 precursor	KISS1	Q15726
Poly [ADP-ribose] polymerase 1	PARP1	P09874
Methionine synthase	MTR	Q99707
ADAM 17 precursor	ADAM17	P78536
DNA (cytosine-5)-methyltransferase 3A	DNMT3A	Q9Y6K1
Probable G-protein coupled receptor 75	GPR75	O95800
Reticulon-4	RTN4	Q9NQC3
Transforming growth factor alpha precursor	TGFA	P01135
Lithostathine 1 alpha precursor	REG1A	P05451
Regenerating islet-derived protein 3 alpha precursor	REG3A	Q06141
S-adenosylmethionine synthetase isoform type-2	MAT2A	P31153
Interleukin-18 receptor accessory protein precursor	IL18RAP	O95256
dudulin 2 isoform b	STEAP3	NP_060704
CD302 antigen precursor	CD302	Q8IX05
Integrin alpha-6 precursor	ITGA6	P23229
Receptor tyrosine-protein kinase erbB-4 precursor	ERBB4	Q15303
RAF proto-oncogene serine/threonine-protein kinase	RAF1	P04049
DNA-repair protein complementing XP-C cells	XPC	Q01831
TGF-beta receptor type-2 precursor	TGFBR2	P37173
Catenin beta-1	CTNNB1	P35222
M-phase inducer phosphatase 1	CDC25A	P30304
Collagen alpha-1(VII) chain precursor	COL7A1	Q02388
Semaphorin-3B precursor	SEMA3B	Q13214
Ras association domain-containing protein 1	RASSF1	Q9NS23
Zinc finger MYND domain-containing protein 10	ZMYND10	O75800
Bis(5'-adenosyl)-triphosphatase	FHIT	P49789
Roundabout homolog 1 precursor	ROBO1	Q9Y6N7
Neprilysin	MME	P08473
Tumor necrosis factor ligand superfamily member 10	TNFSF10	P50591
Phosphatidylinositol-4,5-bisphosphate 3-kinase catalytic subunit alpha isoform	PIK3CA	P42336
Transferrin receptor protein 1	TFRC	P02786
Fibroblast growth factor receptor 3 precursor	FGFR3	P22607
Probable G-protein coupled receptor 78	GPR78	Q96P69
Alpha platelet-derived growth factor receptor precursor	PDGFRA	P16234
UDP-glucuronosyltransferase 2B4 precursor	UGT2B4	P06133
Afamin precursor	AFM	P43652
Macrophage inflammatory protein 2-alpha precursor	CXCL2	P19875
Heparanase precursor	HPSE	Q9Y251
Tyrosine-protein phosphatase non-receptor type 13	PTPN13	Q12923
Osteopontin precursor	SPP1	P10451
ATP-binding cassette sub-family G member 2	ABCG2	Q9UNQ0
Pro-epidermal growth factor precursor	EGF	P01133
Cyclin-A2	CCNA2	P20248
Interleukin-2 precursor	IL2	P60568
Heparin-binding growth factor 2 precursor	FGF2	P09038
Annexin A10	ANXA10	Q9UJ72
Vascular endothelial growth factor C precursor	VEGFC	P49767
Caspase-3 precursor	CASP3	P42574
Plasma kallikrein precursor	KLKB1	P03952
Telomerase reverse transcriptase	TERT	O14746
Adenomatous polyposis coli protein	APC	P25054
Interferon regulatory factor 1	IRF1	P10914
Heat shock 70 kDa protein 4	HSPA4	P34932
Pro-neuregulin-2, membrane-bound isoform precursor	NRG2	O14511
Heparin-binding EGF-like growth factor precursor	HBEGF	Q99075
Heparin-binding growth factor 1 precursor	FGF1	P05230
Dual specificity protein phosphatase 1	DUSP1	P28562
Stanniocalcin-2 precursor	STC2	O76061
Thioredoxin domain-containing protein 5 precursor	MUTED	Q8NBS9
Endothelin-1 precursor	EDN1	P05305
Protein DEK	DEK	P35659
Hereditary hemochromatosis protein precursor	HFE	Q30201
Gastricsin precursor	PGC	P20142
Vascular endothelial growth factor A precursor	VEGFA	P15692
Estrogen receptor	ESR1	P03372
Acetyl-CoA acetyltransferase	ACAT2	Q9BWD1
Parkin	PARK2	O60260
Homeobox protein Hox-A13	HOXA13	P31271
Peptidyl-prolyl cis-trans isomerase A	PPIA_HUMAN	P62937
Insulin-like growth factor-binding protein 1 precursor	IGFBP1	P08833
Epidermal growth factor receptor precursor	EGFR	P00533
Claudin-4	CLDN4	O14493
Guanine nucleotide-binding protein G(i)	GNAI1	P63096
Hepatocyte growth factor precursor	HGF	P14210
Multidrug resistance protein 1	ABCB1	P08183
DNA replication licensing factor MCM7	MCM7	P33993
Plasminogen activator inhibitor 1 precursor	SERPINE1	P05121
SVH protein	NP_114111.2	NP_114111
Dedicator of cytokinesis protein 4	DOCK4	Acc:Q8N1I0
Hepatocyte growth factor receptor precursor	MET	P08581
Leptin precursor	LEP	P41159
Smoothened homolog precursor	SMO	Q99835
Zyxin	ZYX	Q15942
Enhancer of zeste homolog 2	EZH2	Q15910
Sonic hedgehog protein precursor	SHH	Q15465
Angiopoietin-2 precursor	ANGPT2	O15123
Rho-GTPase-activating protein 7	DLC1	Q96QB1
epatocellular carcinoma related protein 1	VPS37A	NP_689628
mitochondrial tumor suppressor 1 isoform 3	MTUS1	NP_001001927
Stanniocalcin-1 precursor	STC1	P52823
Neuregulin-1	NRG1	Q15491
Zinc finger protein SLUG	SNAI2	O43623
Aspartyl/asparaginyl beta-hydroxylase	ASPH	Q12797
COP9 signalosome complex subunit 5	COPS5	Q92905
Stathmin-2	STMN2	Q93045
Carbonic anhydrase 1	CA1	P00915
Carbonic anhydrase 3	CA3	P07451
Cadherin-17 precursor	CDH17	Q12864
Lysosomal-associated transmembrane protein 4B	LAPTM4B	Q86VI4
Angiopoietin-1 precursor	ANGPT1	Q15389
Receptor-binding cancer antigen expressed on SiSo cells	EBAG9	O00559
Eukaryotic translation initiation factor 3 subunit 3	EIF3S3	O15372
Ectonucleotide pyrophosphatase/phosphodiesterase 2	ENPP2	Q13822
Hyaluronan synthase 2	HAS2	Q92819
Zinc fingers and homeoboxes protein 2	ZHX2	Q9Y6X8
Metastasis suppressor protein 1	MTSS1	O43312
Myc proto-oncogene protein	MYC	P01106
Focal adhesion kinase 1	PTK2	Q05397
Lymphocyte antigen Ly-6E precursor	LY6E	Q16553
Glycosylphosphatidylinositol anchor attachment 1 protein	GPAA1	O43292
Prorelaxin H1 precursor	RLN1	P04808
S-methyl-5-thioadenosine phosphorylase	MTAP	Q13126
Cyclin-dependent kinase inhibitor 2A	CDKN2A	P42771
Cyclin-dependent kinase 4 inhibitor B	CDKN2B	P42772
Angiopoietin-1 receptor precursor	TEK	Q02763
Growth arrest and DNA-damage-inducible protein GADD45 gamma	GADD45G	O95257
Protein patched homolog 1	PTCH1	Q13635
erine/threonine-protein kinase Nek6	NEK6	Q9HC98
Endoglin precursor	ENG	P17813
Neutrophil gelatinase-associated lipocalin precursor	LCN2	P80188
Krueppel-like factor 6	KLF6	Q99612
tRNA (cytosine-5-)-methyltransferase	TRDMT1	O14717
Integrin beta-1 precursor	ITGB1	P05556
Proto-oncogene tyrosine-protein kinase receptor ret precursor	RET	P07949
Urokinase-type plasminogen activator precursor	PLAU	P00749
Pro-neuregulin-3	NRG3	P56975
Gamma-synuclein	SNCG	O76070
Phosphatidylinositol-3,4,5-trisphosphate 3-phosphatase and dual- specificity protein phosphatase PTEN	PTENP1	P60484
Tumor necrosis factor receptor superfamily member 6 precursor	FAS	P25445
Transcription factor 7-like 2	TCF7L2	Q9NQB0
Ornithine aminotransferase	OAT	P04181
Antigen KI-67	MKI67	P46013
Methylated-DNA--protein-cysteine methyltransferase	MGMT	P16455
imprinted maternally expressed untranslated mRNA (H19) on chromosome 11	H19	NR_002196
CD81 antigen	CD81	P60033
Cyclin-dependent kinase inhibitor 1C	CDKN1C	P49918
Organic cation transporter-like protein 2	SLC22A18	Q96BI1
Lymphatic vessel endothelial hyaluronic acid receptor 1 precursor	XLKD1	Q9Y5Y7
CD44 antigen precursor	CD44	P16070
CD82 antigen	CD82	P27701
Bcl2 antagonist of cell death	BAD	Q92934
Glutathione S-transferase P	GSTP1	P09211
G1/S-specific cyclin-D1	CCND1	P24385
FADD protein	FADD	Q13158
Fucosyltransferase 4	FUT4	P22083
Matrix metalloproteinase-7	MMP7	P09237
Matrix metalloproteinase-3	MMP3	P08254
Matrix metalloproteinase-12	MMP12	P39900
Caspase-1 precursor	CASP1	P29466
hepatocyte cell adhesion molecule	NP_689935.1	NP_689935
associated with liver cancer	NP_001032647.1	NP_001032647
FK506-binding protein 4	FKBP4	Q02790
CD9 antigen	CD9	P21926
Scavenger receptor cysteine-rich type 1 protein M130 precursor	CD163	Q86VB7
DNA-binding protein A	CSDA	P16989
Cyclin-dependent kinase inhibitor 1B	CDKN1B	P46527
Solute carrier organic anion transporter family member 1B1	SLCO1B1	Q9Y6L6
GTPase KRas	KRAS	P01116
LETM1 domain containing 1 isoform 1	LETMD1	NP_056231
Receptor tyrosine-protein kinase erbB-3 precursor	ERBB3	P21860
Zinc finger protein GLI1	GLI1	P08151
Tetraspanin-8	TSPAN8	P19075
Leucine-rich repeat-containing G-protein coupled receptor 5 precursor	LGR5	O75473
Decorin precursor	DCN	P07585
Insulin-like growth factor IA precursor	IGF1	P01343
Gap junction beta-2 protein	GJB2	P29033
Lambda-crystallin homolog	CRYL1	Q9Y2S2
Heat-shock protein 105 kDa	HSPH1	Q92598
Tumor necrosis factor ligand superfamily member 11	TNFSF11	O14788
Retinoblastoma-associated protein	RB1	P06400
Endothelin B receptor precursor	EDNRB	P24530
Sprouty homolog 2	SPRY2	O43597
Defender against cell death 1	DAD1	P61803
Matrix metalloproteinase-14 precursor	MMP14	P50281
Somatostatin receptor type 1	SSTR1	P30872
60S ribosomal protein L36a-like	RPL36AL	Q969Q0
Galectin-3	LGALS3	P17931
Dapper homolog 1	DACT1	Q9NYF0
Sphingosine-1-phosphate phosphatase 1	SGPP1	Q9BX95
Sodium/bile acid cotransporter	SLC10A1	Q14973
Proto-oncogene protein c-fos	FOS	P01100
Heat shock protein HSP 90-alpha	HSP90AA1	P07900
Metastasis-associated protein MTA1	MTA1	Q13330
Sprouty-related, EVH1 domain-containing protein 1	SPRED1	Q7Z699
Kunitz-type protease inhibitor 1 precursor	SPINT1	O43278
PCNA-associated factor	KIAA0101	Q15004
Dual specificity mitogen-activated protein kinase kinase 1	MAP2K1	Q02750
Calcium and integrin-binding protein 2	CIB2	O75838
LBC oncogene	AKAP13	Q12802
Arrestin domain-containing protein 4	ARRDC4	Q8NCT1
Axis inhibition protein 1	AXIN1	O15169
Somatostatin receptor type 5	SSTR5	P35346
Augmenter of liver regeneration	GFER	P55789
Suppressor of cytokine signaling 1	SOCS1	O15524
Polo-like kinase 1	PLK1	P53350
Serine/threonine-protein kinase TAO2	TAOK2	Q9UL54
Mitogen-activated protein kinase 3	MAPK3	P27361
Zinc finger protein 689	ZNF689	Q96CS4
pyrin domain containing 1	PYDC1	NP_690865
Seven in absentia homolog 1	SIAH1	Q8IUQ4
Retinoblastoma-like protein 2	RBL2	Q08999
Matrix metalloproteinase-2	MMP2	P08253
Epithelial-cadherin precursor	CDH1	P12830
Haptoglobin precursor	HP	P00738
WW domain-containing oxidoreductase isoform 3	WWOX	NP_570859
Vacuolar protein sorting-associated protein 53	VPS53	Q5VIR6
Degradation in endoplasmic reticulum protein 2	DERL2	Q9GZP9
Centaurin-beta 1	CENTB1	Q15027
Tumor suppressor p53	TP53	P04637
Nitric oxide synthase	NOS2A	P35228
Receptor tyrosine-protein kinase erbB-2 precursor	ERBB2	P04626
Retinoic acid receptor alpha	RARA	P10276
TOP2A_HUMAN Isoform 2 of P11388 - Homo sapiens	P11388-3	P11388-2
Keratin, type I cytoskeletal 19	KRT19	P08727
ETS translocation variant 4	ETV4	P43268
Granulins precursor	GRN	P28799
Dynein light chain 2	DYNLL2	Q96FJ2
Axis inhibition protein 2	AXIN2	Q9Y2T1
Somatostatin receptor type 2	SSTR2	P30874
Ezrin-radixin-moesin-binding phosphoprotein 50	SLC9A3R1	O14745
Baculoviral IAP repeat-containing protein 5	BIRC5	O15392
tumor necrosis factor superfamily, member 5-induced protein 1	TNFSF5IP1	NP_064617
Mothers against decapentaplegic homolog 2	SMAD2	Q15796
Mothers against decapentaplegic homolog 4	SMAD4	Q13485
Netrin receptor DCC precursor	DCC	P43146
Plasminogen activator inhibitor 2 precursor	SERPINB2	P05120
Ubiquitin-conjugating enzyme E2-32 kDa complementing	CDC34	P49427
KiSS-1 receptor	KISS1R	Q969F8
Growth arrest and DNA-damage-inducible protein GADD45 beta	GADD45B	O75293
Dual specificity mitogen-activated protein kinase kinase 2	MAP2K2	P36507
cAMP responsive element binding protein 3-like 3	CREB3L3	NP_115996
Scaffold attachment factor B	SAFB	Q15424
Peptidyl-prolyl cis-trans isomerase NIMA-interacting 1	PIN1	Q13526
DNA (cytosine-5)-methyltransferase 1	DNMT1	P26358
Intercellular adhesion molecule 1 precursor	ICAM1	P05362
Tartrate-resistant acid phosphatase type 5 precursor	ACP5	P13686
Transcription factor jun-B	JUNB	P17275
Peroxiredoxin-2	PRDX2	P32119
G1/S-specific cyclin-E1	CCNE1	P24864
Kunitz-type protease inhibitor 2 precursor	SPINT2	O43291
Galectin-4	LGALS4	P56470
RAC-beta serine/threonine-protein kinase	AKT2	P31751
Glycogen synthase kinase-3 alpha	GSK3A	P49840
ETHE1 protein	ETHE1	O95571
Apolipoprotein E precursor	APOE	P02649
Zinc finger protein 342	ZNF342	Q8WUU4
DNA excision repair protein ERCC-1	ERCC1	P07992
Apoptosis regulator BAX	BAX	Q07814
Ferritin light chain	FTL	P02792
M-phase inducer phosphatase 2	CDC25B	P30305
DNA-binding protein inhibitor ID-1	ID1	P41134
DNA (cytosine-5)-methyltransferase 3B	DNMT3B	Q9UBC3
Microtubule-associated protein RP/EB family member 1	MAPRE1	Q15691
Transcription factor E2F1	E2F1	Q01094
Proto-oncogene tyrosine-protein kinase Src	SRC	P12931
Myb-related protein B	MYBL2	P10244
Tumor necrosis factor receptor superfamily member 5 precursor	CD40	P25942
Zinc finger protein SNAI1	SNAI1	O95863
Serine/threonine-protein kinase 6	AURKA	O14965
Guanine nucleotide-binding protein G(s) subunit alpha isoforms XLas	GNAS	Q5JWF2
Putative tyrosine-protein phosphatase TPTE	TPTE	P56180
B melanoma antigen 3 precursor	BAGE5	Q86Y29
T-lymphoma invasion and metastasis-inducing protein 1	TIAM1	Q13009
Trefoil factor 3 precursor	TFF3	Q07654
Cystathionine beta-synthase	CBS	P35520
Ubiquitin-conjugating enzyme E2 L3	UBE2L3	P68036
Mitogen-activated protein kinase 1	MAPK1	P28482
Macrophage migration inhibitory factor	MIF	P14174
Somatostatin receptor type 3	SSTR3	P32745
Hsc70-interacting protein	FAM10A6	P50502
Membrane protein MLC1	MLC1	Q15049
Thymidine phosphorylase precursor	ECGF1	P19971
CD99 antigen precursor	CD99	P14209
ATP-dependent RNA helicase DDX3X	DDX3X	O00571
Protein SSX5	SSX5	O60225
Protein SSX1	SSX1	Q16384
Protein SSX4	SSX4_HUMAN	O60224
G antigen 1	GAGE8	Q13065
Protein SSX2	SSX2_HUMAN	Q16385
Androgen receptor	AR	P10275
Ephrin-B1 precursor	EFNB1	P98172
Gap junction beta-1 protein	GJB1	P08034
6S proteasome non-ATPase regulatory subunit 10	PSMD10	O75832
leucine zipper protein 4	LUZP4	NP_057467
Coagulation factor IX precursor	F9	P00740
Sperm protein associated with the nucleus on the X chromosome C	SPANXC	Q9NY87
Melanoma-associated antigen C2	MAGEC2	Q9UBF1
Melanoma-associated antigen 11	MAGEA11	P43364
Melanoma-associated antigen 8	MAGEA8	P43361
Fetal and adult testis-expressed transcript protein	FATE1	Q969F0
Melanoma-associated antigen 4	MAGEA4	P43358
Gamma-aminobutyric-acid receptor subunit epsilon precursor	GABRE	P78334
Melanoma-associated antigen 10	MAGEA10	P43363
Melanoma-associated antigen 2	MAGEA2B	P43356
Melanoma-associated antigen 3	MAGEA3	P43357
Melanoma-associated antigen 1	MAGEA1	P43355
Cancer/testis antigen 1B	CTAG1A	P78358
Testis-specific Y-encoded protein 1	TSPY1_HUMAN	Q01534
RNA-binding motif protein	RBMY1B	Q15414
