# Supplementary material for: Systematic Investigation of Scutellariae Barbatae Herba for Treating Hepatocellular Carcinoma Based on Network Pharmacology
Source: Evid Based Complement Alternat Med. 2018 Nov 21;2018:4365739. doi: 10.1155/2018/4365739 (PMC6280310; doi:10.1155/2018/4365739)
Supplement: Supplementary Materials — Table S1: 29 active ingredients from TCMSP. Table S2: ingredients in SBH and corresponding targets. Table S3: HCC targets. Table S4: candidate targets of SBH. Table S5: Gene Ontology (GO) Molecular Function Analysis for candidate targets of SBH. Table S6: Gene Ontology (GO) Biological Process Analysis for candidate targets of SBH. Table S7: Reactome analysis for candidate targets of SBH. Table S8: hit genes analysed by Expression Atlas. [file 4365739.f1.zip › 4365739.f1/Table S4.xlsx]

## Sheet: Sheet1
Table S4 candidate targets of SBH
Protein Name	Gene symbol	Uniplot
Serum albumin	ALB	P02768
Carbonic anhydrase 2	CA2	P00918
Vitamin D-binding protein	GC	P02774
Ribonuclease UK114	HRSP12	P52758
Transthyretin	TTR	P02766
Peptidyl-prolyl cis-trans isomerase A	PPIA	P62937
Carbonic anhydrase 1	CA1	P00915
Cyclin-A2	CCNA2	P20248
S-methyl-5-thioadenosine phosphorylase	MTAP	Q13126
Glutathione S-transferase P	GSTP1	P09211
Epidermal growth factor receptor	EGFR	P00533
Estrogen receptor	ESR1	P03372
Heat shock protein HSP 90-alpha	HSP90AA1	P07900
Urokinase-type plasminogen activator	PLAU	P00749
Proto-oncogene tyrosine-protein kinase Src	SRC	P12931
Serine/threonine-protein kinase 6	AURKA	O14965
Heat shock cognate 71 kDa protein	HSPA8	P11142
Androgen receptor	AR	P10275
Aldo-keto reductase family 1 member C2	AKR1C2	P52895
Mitogen-activated protein kinase 1	MAPK1	P28482
Liver carboxylesterase 1	CES1	P23141
