# Supplementary material for: Systematic Investigation of Scutellariae Barbatae Herba for Treating Hepatocellular Carcinoma Based on Network Pharmacology
Source: Evid Based Complement Alternat Med. 2018 Nov 21;2018:4365739. doi: 10.1155/2018/4365739 (PMC6280310; doi:10.1155/2018/4365739)
Supplement: Supplementary Materials — Table S1: 29 active ingredients from TCMSP. Table S2: ingredients in SBH and corresponding targets. Table S3: HCC targets. Table S4: candidate targets of SBH. Table S5: Gene Ontology (GO) Molecular Function Analysis for candidate targets of SBH. Table S6: Gene Ontology (GO) Biological Process Analysis for candidate targets of SBH. Table S7: Reactome analysis for candidate targets of SBH. Table S8: hit genes analysed by Expression Atlas. [file 4365739.f1.zip › 4365739.f1/Table S5.xlsx]

## Sheet: Sheet1
Table S5 Gene Ontology (GO) Molecular Function analysis (p < 0.01)
name	p value	description_SBH-HCC-MF	Genes
5496	0.000269	steroid binding	AR AKR1C2 GC ESR1
30235	0.00137	nitric-oxide synthase regulator activity	HSP90AA1 ESR1
4089	0.00727	carbonate dehydratase activity	CA1 CA2
8289	0.00727	lipid binding	AR ALB AKR1C2 GC ESR1
