# Supplementary material for: Systematic Investigation of Scutellariae Barbatae Herba for Treating Hepatocellular Carcinoma Based on Network Pharmacology
Source: Evid Based Complement Alternat Med. 2018 Nov 21;2018:4365739. doi: 10.1155/2018/4365739 (PMC6280310; doi:10.1155/2018/4365739)
Supplement: Supplementary Materials — Table S1: 29 active ingredients from TCMSP. Table S2: ingredients in SBH and corresponding targets. Table S3: HCC targets. Table S4: candidate targets of SBH. Table S5: Gene Ontology (GO) Molecular Function Analysis for candidate targets of SBH. Table S6: Gene Ontology (GO) Biological Process Analysis for candidate targets of SBH. Table S7: Reactome analysis for candidate targets of SBH. Table S8: hit genes analysed by Expression Atlas. [file 4365739.f1.zip › 4365739.f1/Table S6.xlsx]

## Sheet: Sheet1
Table S6 Gene Ontology (GO) Biological Process analysis (p < 0.01)
name	p value	description_SBH-HCC-BP	Genes
10033	5.4947e-05	response to organic substance	CCNA2 HSPA8 AR HSP90AA1 SRC CA2 MAPK1 ESR1 EGFR AURKA
42221	5.4947e-05	response to chemical stimulus	CCNA2 HSPA8 AR HSP90AA1 SRC CA2 PLAU MAPK1 ESR1 EGFR AURKA CES1
43627	0.00012769	response to estrogen stimulus	CCNA2 CA2 MAPK1 ESR1 AURKA
51704	0.0015086	multi-organism process	HSPA8 AR SRC PLAU ALB MAPK1 ESR1 PPIA
48545	0.002161	response to steroid hormone stimulus	CCNA2 CA2 MAPK1 ESR1 AURKA
9725	0.0031035	response to hormone stimulus	CCNA2 AR CA2 MAPK1 ESR1 AURKA
60745	0.0031035	mammary gland branching involved in pregnancy	AR ESR1
9719	0.0050207	response to endogenous stimulus	CCNA2 AR CA2 MAPK1 ESR1 AURKA
44419	0.0064943	interspecies interaction between organisms	HSPA8 SRC ALB MAPK1 PPIA
60736	0.0064943	prostate gland growth	AR ESR1
32355	0.0065867	response to estradiol stimulus	CCNA2 ESR1 AURKA
60571	0.0086361	morphogenesis of an epithelial fold	AR EGFR
60749	0.0086361	mammary gland alveolus development	AR ESR1
22612	0.0090665	gland morphogenesis	AR ESR1 EGFR
2009	0.0090665	morphogenesis of an epithelium	AR CA2 ESR1 EGFR
60444	0.0090665	branching involved in mammary gland duct morphogenesis	AR ESR1
9887	0.0090665	organ morphogenesis	CCNA2 AR CA2 MAPK1 ESR1 EGFR
45124	0.0090665	regulation of bone resorption	SRC CA2
46850	0.0090665	regulation of bone remodeling	SRC CA2
60135	0.009753	maternal process involved in female pregnancy	AR ESR1
