# Supplementary material for: Systematic Investigation of Scutellariae Barbatae Herba for Treating Hepatocellular Carcinoma Based on Network Pharmacology
Source: Evid Based Complement Alternat Med. 2018 Nov 21;2018:4365739. doi: 10.1155/2018/4365739 (PMC6280310; doi:10.1155/2018/4365739)
Supplement: Supplementary Materials — Table S1: 29 active ingredients from TCMSP. Table S2: ingredients in SBH and corresponding targets. Table S3: HCC targets. Table S4: candidate targets of SBH. Table S5: Gene Ontology (GO) Molecular Function Analysis for candidate targets of SBH. Table S6: Gene Ontology (GO) Biological Process Analysis for candidate targets of SBH. Table S7: Reactome analysis for candidate targets of SBH. Table S8: hit genes analysed by Expression Atlas. [file 4365739.f1.zip › 4365739.f1/Table S7.xlsx]

## Sheet: Sheet1
Table S7 Reactome pathway analysis (p <0.01)
ReactomePathway	Reactome Identifiers	P-value	FDR0.05	HitGenes
Neutrophil degranulation	R-HSA-6798695	1.27e-05	0.00343	HSPA8,HSP90AA1,GSTP1,TTR,PLAU,MAPK1,PPIA
L1CAM interactions	R-HSA-373760	2.9e-05	0.00389	HSPA8,SRC,EGFR,MAPK1
Signaling by ERBB2	R-HSA-1227986	0.000116	0.0103	HSP90AA1,SRC,EGFR
Attenuation phase	R-HSA-3371568	0.00028	0.0157	HSPA8,HSP90AA1
TFAP2 (AP-2) family regulates transcription of growth factors and their receptors	R-HSA-8866910	0.000332	0.0157	ESR1,EGFR
Innate Immune System	R-HSA-168249	0.000357	0.0157	HSPA8,HSP90AA1,SRC,GSTP1,EGFR,TTR,PLAU,MAPK1,PPIA
Spry regulation of FGF signaling	R-HSA-1295596	0.000588	0.0192	SRC,MAPK1
Cellular response to heat stress	R-HSA-3371556	0.000659	0.0192	HSPA8,HSP90AA1,MAPK1
Thrombin signalling through proteinase activated receptors (PARs)	R-HSA-456926	0.000663	0.0192	SRC,MAPK1
Signal transduction by L1	R-HSA-445144	0.00101	0.0261	EGFR,MAPK1
HSF1-dependent transactivation	R-HSA-3371571	0.0011	0.0265	HSPA8,HSP90AA1
Recycling pathway of L1	R-HSA-437239	0.0012	0.0265	SRC,MAPK1
Platelet activation, signaling and aggregation	R-HSA-76002	0.00137	0.0274	SRC,ALB,MAPK1,PPIA
Downregulation of ERBB2 signaling	R-HSA-8863795	0.00153	0.0291	HSP90AA1,EGFR
Negative regulation of FGFR3 signaling	R-HSA-5654732	0.0019	0.0311	SRC,MAPK1
GAB1 signalosome	R-HSA-180292	0.00201	0.0311	SRC,EGFR,MAPK1
Negative regulation of FGFR4 signaling	R-HSA-5654733	0.00216	0.0311	SRC,MAPK1
Transcriptional regulation by the AP-2 (TFAP2) family of transcription factors	R-HSA-8864260	0.00244	0.0311	ESR1,EGFR
Negative regulation of FGFR1 signaling	R-HSA-5654726	0.00244	0.0311	SRC,MAPK1
Negative regulation of FGFR2 signaling	R-HSA-5654727	0.00259	0.0311	SRC,MAPK1
EPHA-mediated growth cone collapse	R-HSA-3928663	0.00259	0.0311	HSP90AA1,SRC
VEGFA-VEGFR2 Pathway	R-HSA-4420097	0.00295	0.035	HSP90AA1,SRC,EGFR,MAPK1
Axon guidance	R-HSA-422475	0.00318	0.035	HSPA8,HSP90AA1,SRC,EGFR,MAPK1
Signaling by VEGF	R-HSA-194138	0.00327	0.0352	HSP90AA1,SRC,EGFR,MAPK1
Signaling by FGFR3	R-HSA-5654741	0.00356	0.0352	SRC,MAPK1
Signaling by FGFR4	R-HSA-5654743	0.00373	0.0352	SRC,MAPK1
Signaling by ERBB4	R-HSA-1236394	0.00391	0.0352	ESR1,EGFR
Metabolism of fat-soluble vitamins	R-HSA-6806667	0.0041	0.0369	TTR,GC
Fcgamma receptor (FCGR) dependent phagocytosis	R-HSA-2029480	0.00499	0.0422	HSP90AA1,SRC,MAPK1
Signaling by FGFR1	R-HSA-5654736	0.00528	0.0422	SRC,MAPK1
Nuclear Receptor transcription pathway	R-HSA-383280	0.0057	0.0424	ESR1,AR
G2/M Transition	R-HSA-69275	0.0062	0.0424	HSP90AA1,AURKA,CCNA2
Mitotic G2-G2/M phases	R-HSA-453274	0.0064	0.0424	HSP90AA1,AURKA,CCNA2
Reversible hydration of carbon dioxide	R-HSA-1475029	0.00666	0.0424	CA2
Methionine salvage pathway	R-HSA-1237112	0.00666	0.0424	MTAP
Phosphorylation of proteins involved in the G2/M transition by Cyclin A:Cdc2 complexes	R-HSA-170145	0.00666	0.0424	CCNA2
Regulation of gap junction activity	R-HSA-191650	0.00666	0.0424	SRC
c-src mediated regulation of Cx43 function and closure of gap junctions	R-HSA-191647	0.00666	0.0424	SRC
Regulation of HSF1-mediated heat shock response	R-HSA-3371453	0.00707	0.0424	HSPA8,MAPK1
PLCG1 events in ERBB2 signaling	R-HSA-1251932	0.00888	0.0521	EGFR
