# Supplementary material for: Systematic Investigation of Scutellariae Barbatae Herba for Treating Hepatocellular Carcinoma Based on Network Pharmacology
Source: Evid Based Complement Alternat Med. 2018 Nov 21;2018:4365739. doi: 10.1155/2018/4365739 (PMC6280310; doi:10.1155/2018/4365739)
Supplement: Supplementary Materials — Table S1: 29 active ingredients from TCMSP. Table S2: ingredients in SBH and corresponding targets. Table S3: HCC targets. Table S4: candidate targets of SBH. Table S5: Gene Ontology (GO) Molecular Function Analysis for candidate targets of SBH. Table S6: Gene Ontology (GO) Biological Process Analysis for candidate targets of SBH. Table S7: Reactome analysis for candidate targets of SBH. Table S8: hit genes analysed by Expression Atlas. [file 4365739.f1.zip › 4365739.f1/Table S8.xlsx]

## Sheet: Sheet1
Table S8 Hit genes analysed by Expression Atlas
genes	adipose tissue	adrenal gland	bone marrow	cerebral cortex	colon	duodenum	endometrium	esophagus	fallopian tube	gall bladder	heart	kidney	liver	lung	lymph node	ovary	pancreas	placenta	prostate gland	rectum	saliva-secreting gland	skeletal muscle tissue	small intestine	smooth muscle tissue	spleen	stomach	testis	thyroid gland	tonsil	urinary bladder	vermiform appendix	zone of skin
TTR	0.9	NA	NA	NA	1	5	NA	NA	NA	25	NA	1	2802	NA	NA	NA	130	0.8	0.5	2	NA	NA	3	NA	2	23	1	NA	NA	NA	NA	3
HSPA8	367	871	382	1089	521	532	480	617	835	987	360	624	478	629	850	594	134	744	579	594	237	421	527	851	658	441	681	825	1208	844	904	240
HSP90AA1	438	853	608	1458	526	290	608	416	1091	1081	355	443	289	631	641	654	75	767	693	566	354	168	407	737	446	447	1319	596	705	696	769	406
PPIA	250	289	369	417	441	298	365	455	374	340	94	240	204	390	629	294	44	380	307	527	134	23	307	520	434	274	184	389	811	423	527	424
GSTP1	140	174	324	86	173	264	368	896	662	449	109	140	13	535	285	318	49	421	192	118	80	56	234	161	239	493	53	635	219	384	243	339
MAPK1	36	50	30	182	47	29	57	65	60	60	25	39	20	63	55	51	9	47	53	50	20	10	37	71	60	39	61	102	52	57	54	73
PLAU	45	10	48	3	20	21	35	14	20	91	9	48	9	45	33	0.7	4	99	18	37	6	4	20	62	80	13	6	22	13	113	73	52
